# Supplementary material for: Sulfur-Containing Carotenoids from A Marine Coral Symbiont Erythrobacter flavus Strain KJ5
Source: PubMed Central journal article supplement (PMC6627997; doi:10.3390/md17060349), 2019-06-11
Supplement: marinedrugs-17-00349-s001.pdf [file marinedrugs-17-00349-s001.pdf]

# Supplementary Materials: Sulfur-containing carotenoids from a marine coral symbiont *Erythrobacter flavus* strain KJ5

Edi Setiyono <sup>1</sup>, Heriyanto <sup>1</sup>, Delianis Pringgienis <sup>2</sup>, Yuzo Shioi <sup>1</sup>, Yu Kanesaki <sup>3</sup>, Koichiro Awai <sup>4</sup> and Tatas Hardo Panintingjati Brotosudarmo <sup>1,\*</sup>

<sup>1</sup> Ma Chung Research Center for Photosynthetic Pigments (MRCPP) and Department of Chemistry, Universitas Ma Chung, Villa Puncak Tidar N01, Malang 465151, Indonesia

<sup>2</sup> Department of Coastal Resource Management, Universitas Diponegoro, Jl. Prof. Soedarto Tembalang, Semarang 50275, Indonesia

<sup>3</sup> Research Institute of Green Science and Technology, Shizuoka University, 836 Ohya, Suruga-ku, Shizuoka 422-8529, Japan

<sup>4</sup> Department of Biological Science, Shizuoka University, 836 Ohya, Suruga-ku, Shizuoka 422-8529, Japan

\* Correspondence: tatas.brotosudarmo@machung.ac.id; Tel.: +62-341-550-171

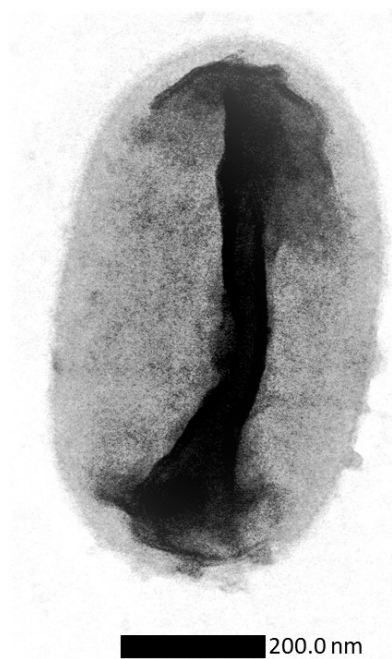

**Figure S1.** The morphological image of the *E. flavus* strain KJ5 cell that was observed by using the Transmission Electron Microscope JEOL JEM 1400 at 100 KV with magnification at 20000 $\times$ . Cell was an ovoid rod-shaped, non-flagellated, sized at a 0.1–0.5  $\mu\text{m}$  width and 0.2–1.0  $\mu\text{m}$  length.

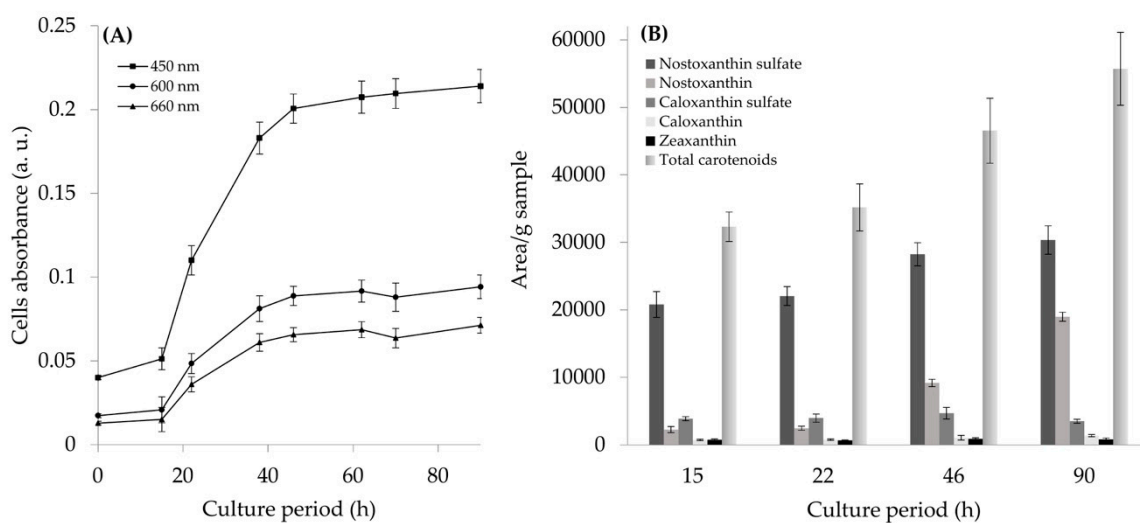

**Figure S2.** The growth curve of *E. flavus* strain KJ5 in Shioi liquid medium (A) and relative concentration of carotenoids during growth phase (B). The cells were grown aerobically on a shaker (100 rpm) for 3 days. The growth reached to the exponential phase after a 40-h culture. The results are averages of at least three independent experiments, and the vertical bar represents SE.

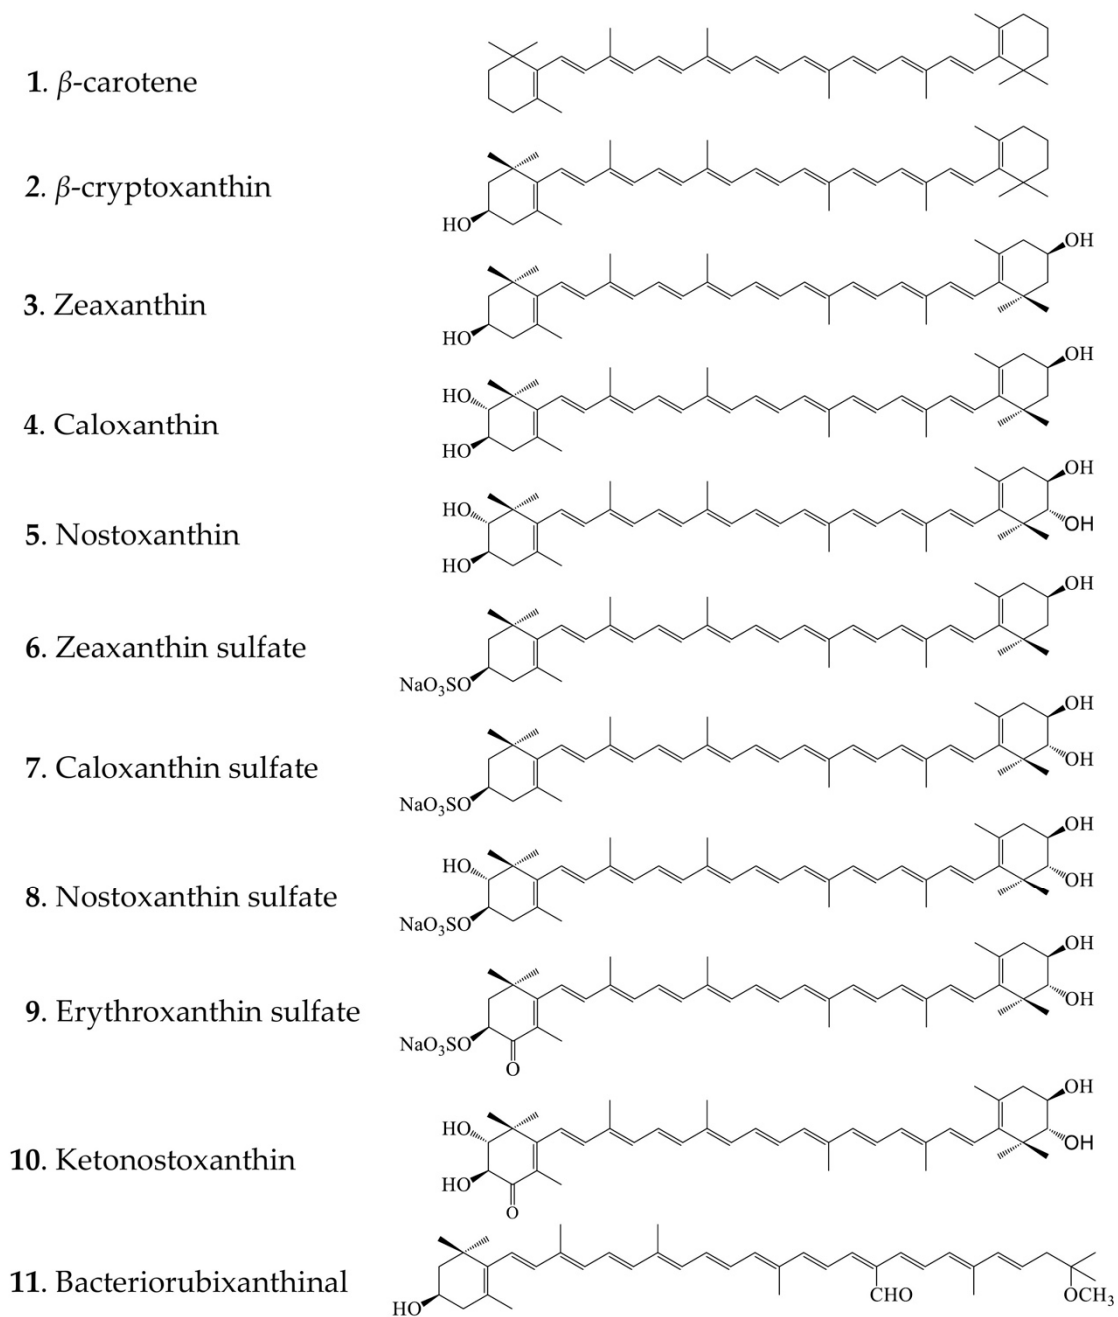

**Figure S3.** Chemical structure of the major carotenoids identified in Table 1.

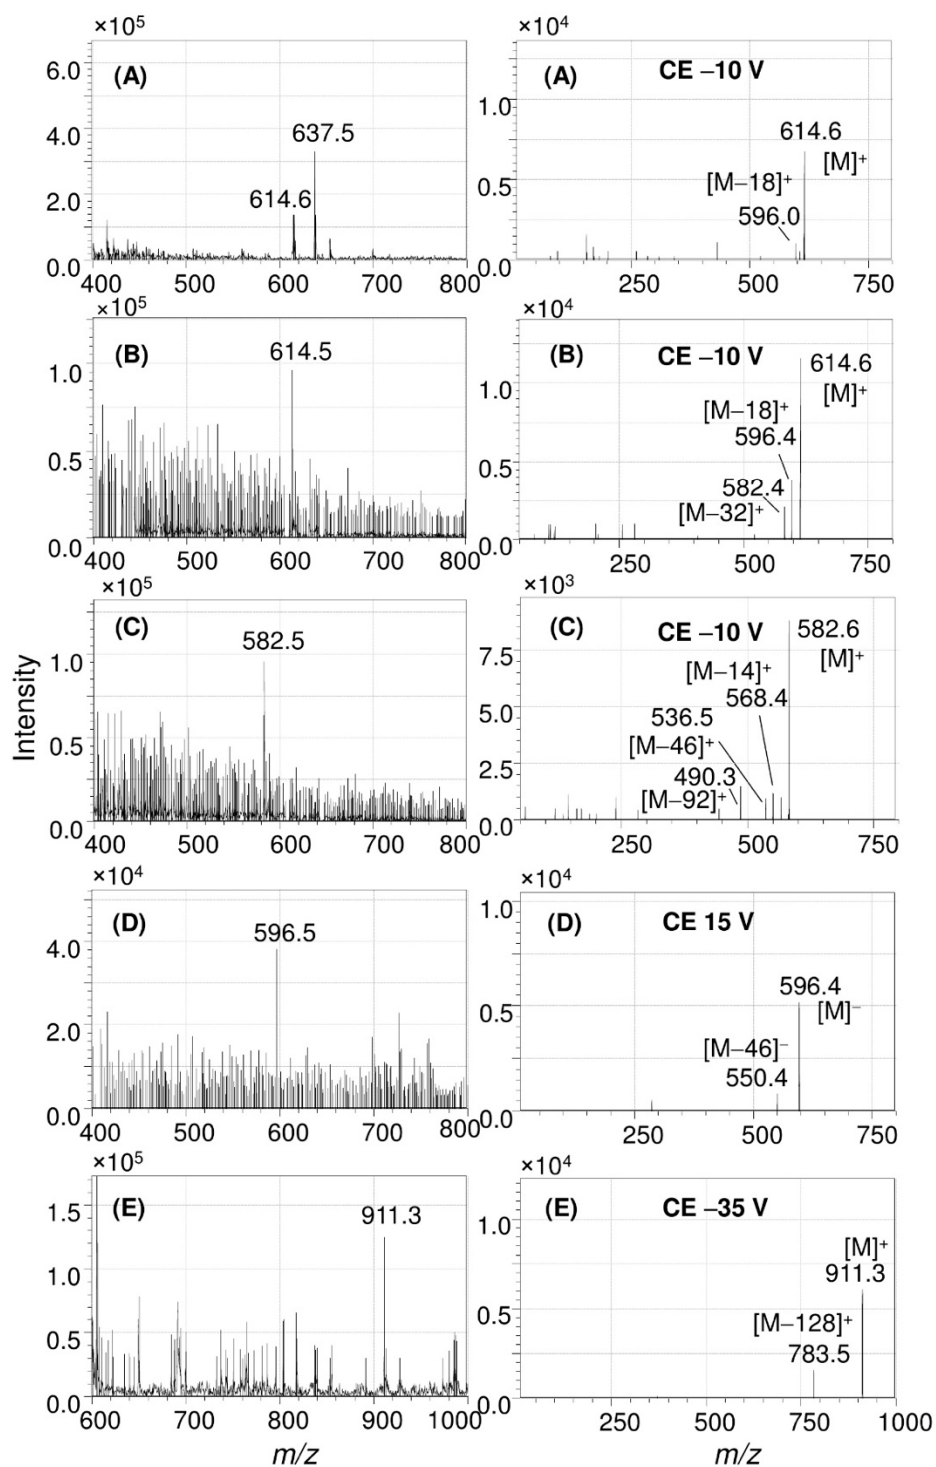

**Figure S4.** Analysis of keto-carotenoids and bacteriochlorophyll in *E. longus* and *E. nanhaesediminis* by ESI-MS by Q1 scan (left) and product ion scan (right). Ketonostoxanthin (A); Ketonostoxanthin *cis* isomer (B); Unidentified (C); bacteriorubixanthinal (D); and bacteriochlorophyll *a* (E)

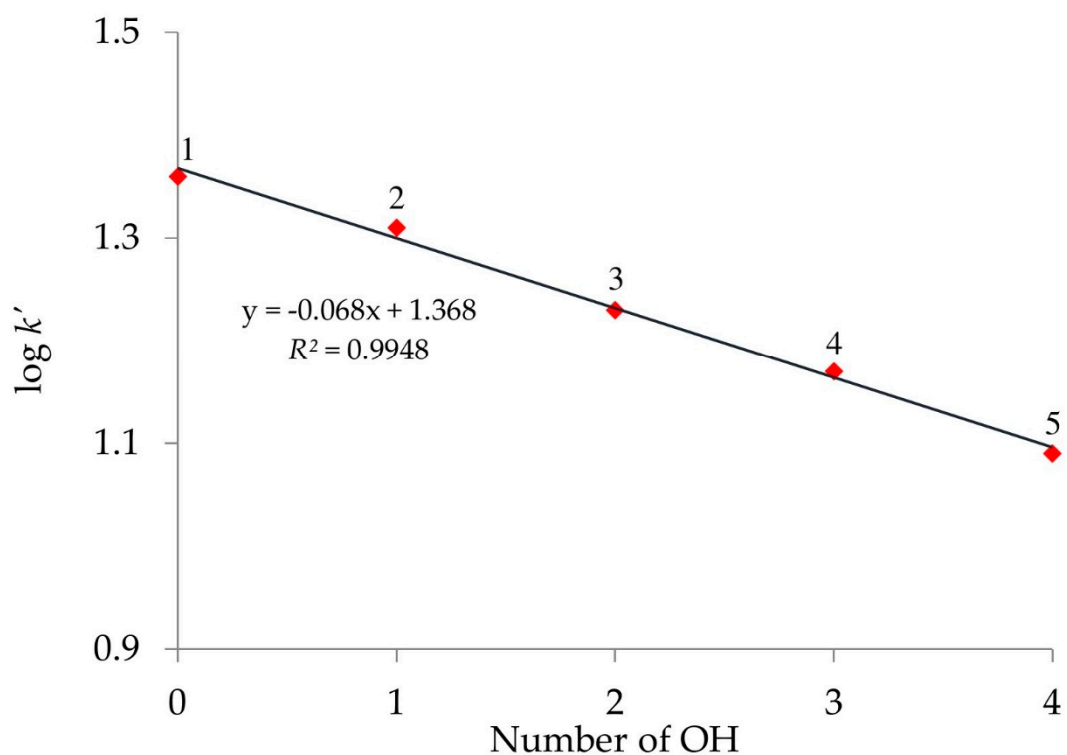

**Figure S5.** The plot of  $\log k'$  value of  $\beta$ -carotene ( $k' = 1.36$ ),  $\beta$ -cryptoxanthin ( $k' = 1.31$ ), zeaxanthin ( $k' = 1.23$ ), caloxanthin ( $k' = 1.17$ ) and nostoxanthin ( $k' = 1.09$ ) versus number of hydroxyl moiety of the carotenoid molecule showed a linear line with  $R^2 = 0.9948$ . The capacity factor ( $k'$ ) was measured by  $k' = (t_R - t_0)/t_0$ , where  $t_R$  and  $t_0$  are the retention times of the retained and unretained solute in the given system, respectively. 1.  $\beta$ -carotene (None); 2.  $\beta$ -cryptoxanthin (OH = 1); 3. Zeaxanthin (OH = 2); 4. Caloxanthin (OH = 3); 5. Nostoxanthin (OH = 4).

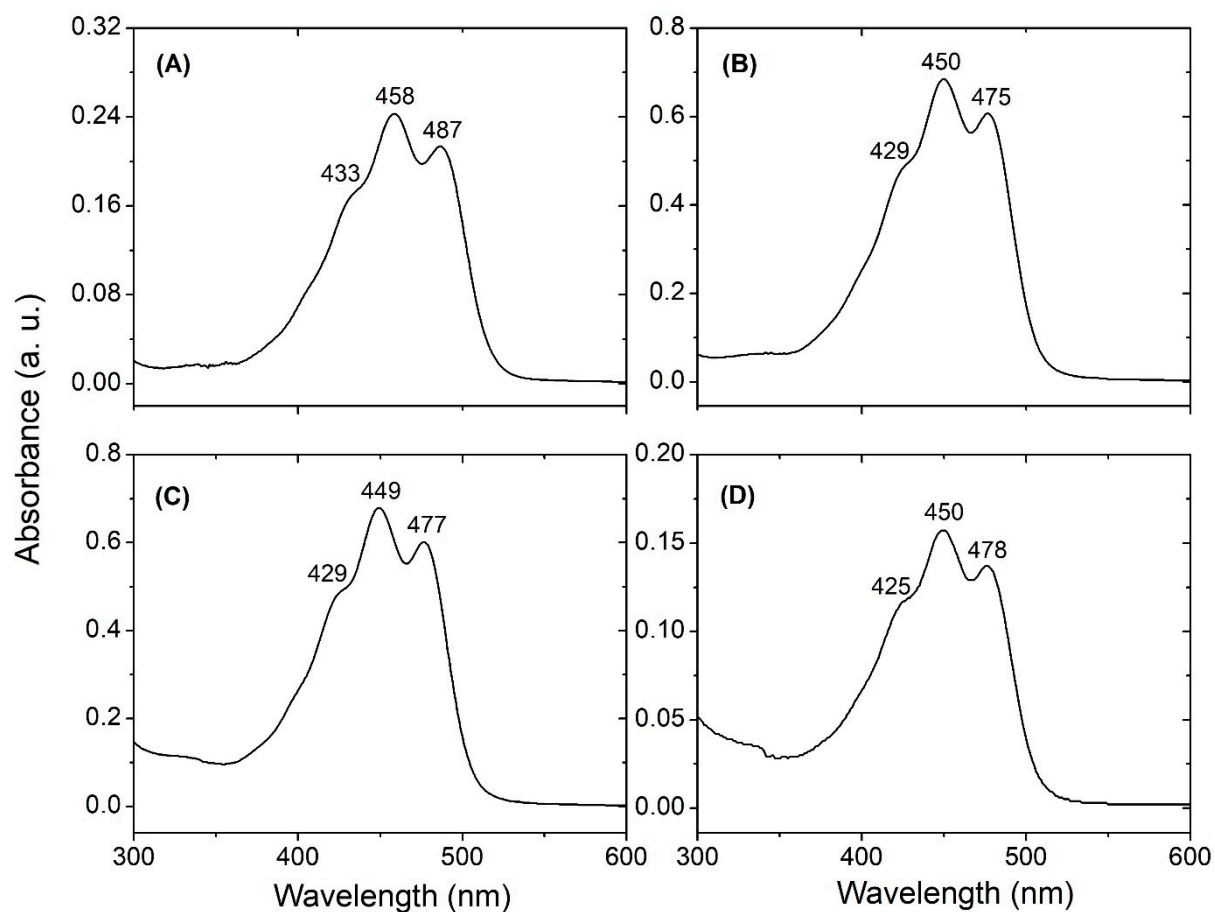

**Figure S6.** The uv-vis absorption spectra of nostoxanthin sulfate in chloroform:MeOH (2:1, v/v) (A) and caloxanthin sulfate in MeOH (B); as well as nostoxanthin (C) and caloxanthin in EtOH (D) of *E. flavus* strain KJ5.

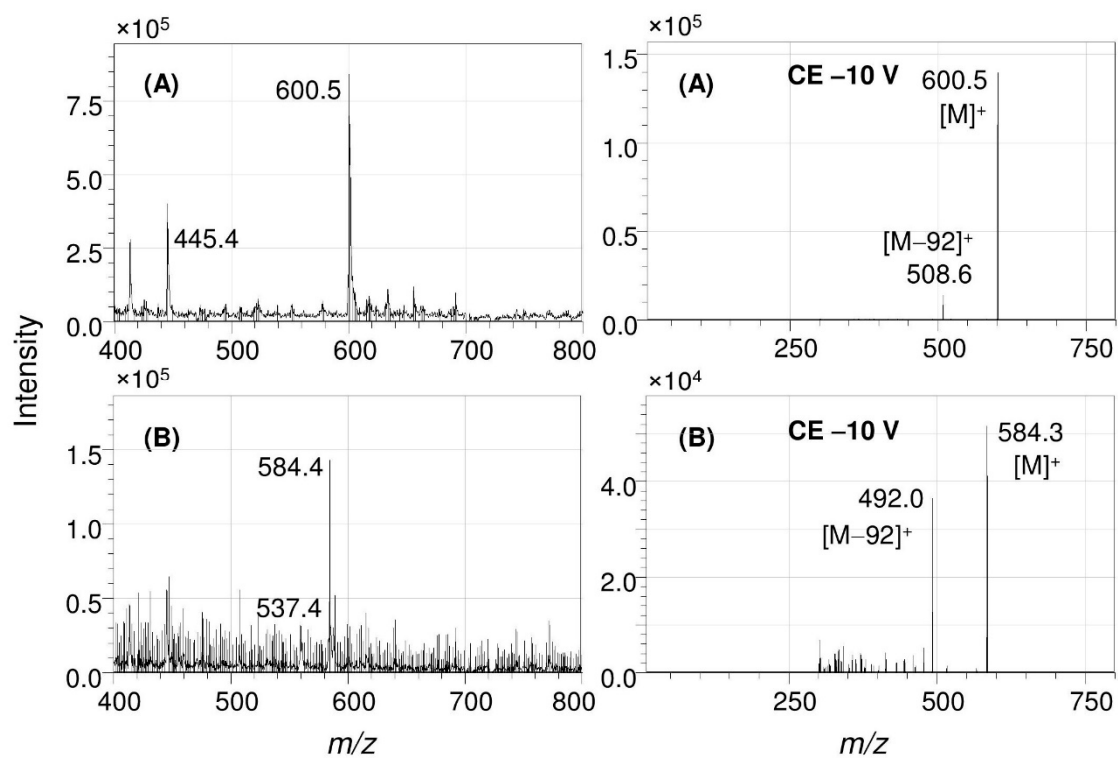

**Figure S7.** Analysis of the non-carotenoids sulfate in *E. flavus* strain KJ5 by ESI-MS/MS by Q1 scan (left) and product ion scan (right), nostoxanthin (A) and caloxanthin (B).



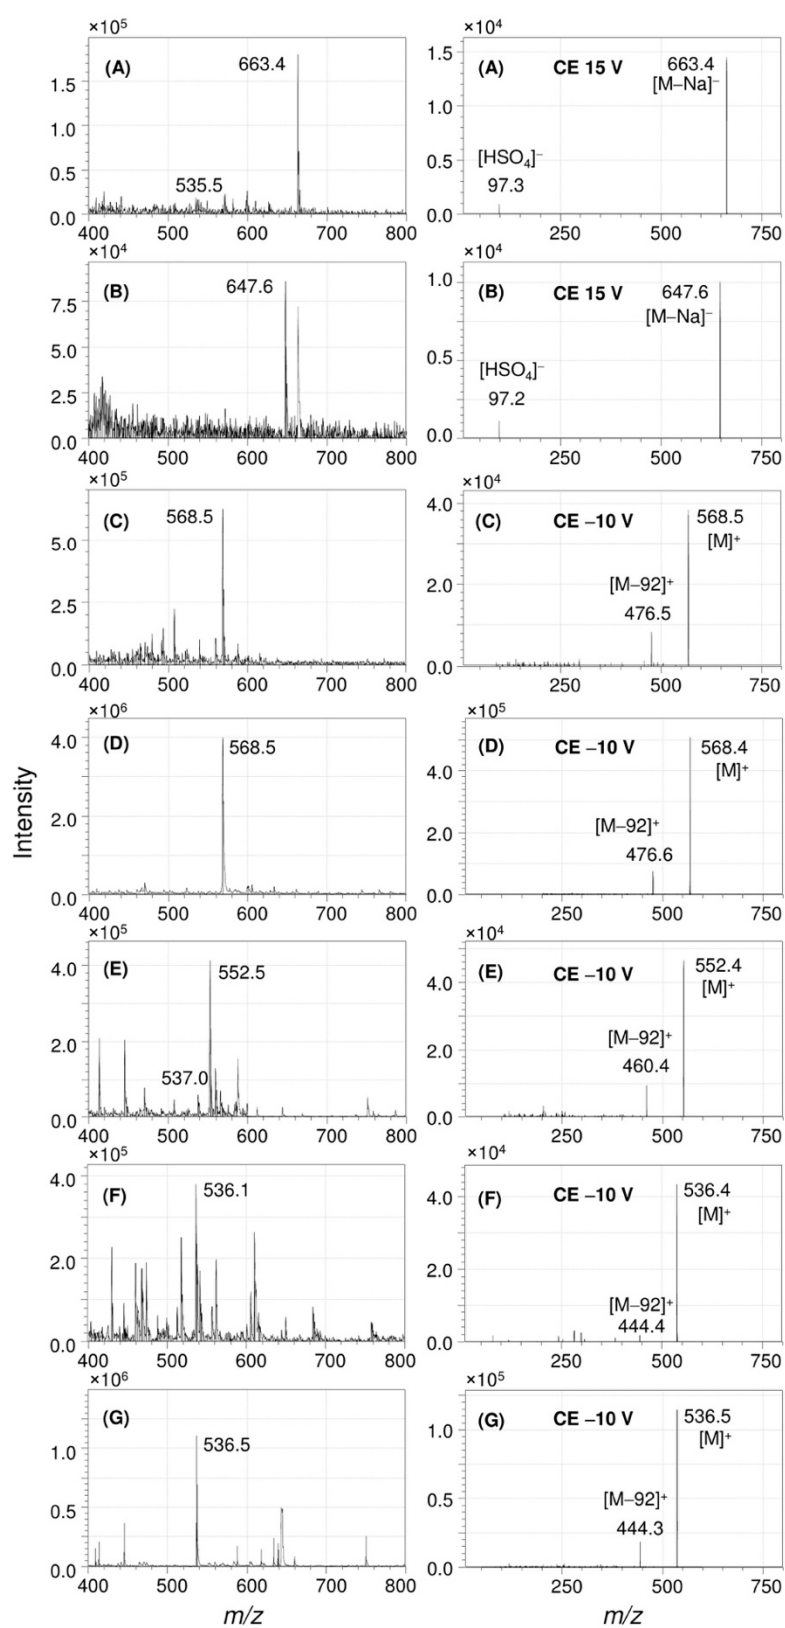

**Figure S8.** Analysis of the carotenoids in *E. flavus* strain KJ5 using ESI-MS by the Q1 scan (left) and product ion scan (right). Caloxanthin sulfate isomer (A); zeaxanthin sulfate *cis* isomer (B); zeaxanthin (C); zeaxanthin isomer (D);  $\beta$ -cryptoxanthin (E);  $\beta$ -carotene *cis* isomer (F); and  $\beta$ -carotene (G).

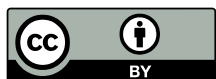

© 2018 by the authors. Submitted for possible open access publication under the terms and conditions of the Creative Commons Attribution (CC BY) license (<http://creativecommons.org/licenses/by/4.0/>).
